# Supplementary material for: Elevated serum complement factors 3 and 4 are strong inflammatory markers of the metabolic syndrome development: a longitudinal cohort study
Source: PubMed Central journal article supplement (PMC4698666; doi:10.1038/srep18713), 2016-01-04
Supplement: srep18713-s1.pdf [file srep18713-s1.pdf]

**Elevated serum complement factors 3 and 4 are strong inflammatory markers of the metabolic syndrome development: a longitudinal cohort study**

Short running title: serum C3, C4 and metabolic syndrome.

Zhenfang Liu<sup>1,2,3</sup>, Qin Tang<sup>1</sup>, Jing Wen<sup>1</sup>, Yan Tang<sup>1</sup>, DaMin Huang<sup>1,4</sup>, Yuzhen Huang<sup>1</sup>, Jinling Xie<sup>1</sup>, Yawen Luo<sup>1</sup>, Min Liang<sup>5</sup>, Chunlei Wu<sup>1,6</sup>, Zheng Lu<sup>1,7</sup>, Aihua Tan<sup>1,8</sup>, Yong Gao<sup>1</sup>, Qiuyan Wang<sup>1,2,3</sup>, Yonghua Jiang<sup>1,2,3</sup>, Ziting Yao<sup>1,2,3</sup>, Xinggu Lin<sup>1,2,3</sup>, Haiying Zhang<sup>1,4</sup>, Zengnan Mo<sup>1,2,3,7</sup>, Xiaobo Yang<sup>1,4\*</sup>

**\*Corresponding author: Xiaobo Yang, E-mail: yxbo21021@163.com**

Supplemental table 1-Correlation coefficients of association between the IgE, IgG, IgM, IgA and other risk parameters of MetS after adjusting multi-factors.

| Variable | IgE            |                | IgG            |                | IgM            |                | IgA            |                |
|----------|----------------|----------------|----------------|----------------|----------------|----------------|----------------|----------------|
|          | R <sub>1</sub> | P <sub>1</sub> | R <sub>2</sub> | P <sub>2</sub> | R <sub>3</sub> | P <sub>3</sub> | R <sub>4</sub> | P <sub>4</sub> |
| BMI      | -0.043         | 0.039          | -0.043         | 0.035          | -0.021         | 0.306          | -0.019         | 0.360          |
| WC       | -0.050         | 0.014          | -0.077         | 0.000          | -0.042         | 0.040          | -0.004         | 0.844          |
| SBP      | 0.002          | 0.914          | -0.007         | 0.748          | -0.032         | 0.122          | 0.048          | 0.019          |
| DBP      | -0.030         | 0.139          | -0.007         | 0.744          | -0.032         | 0.120          | 0.053          | 0.010          |
| TRIG     | -0.029         | 0.155          | -0.078         | 0.000          | 0.030          | 0.151          | -0.019         | 0.359          |
| HDL      | 0.035          | 0.087          | -0.034         | 0.102          | 0.002          | 0.906          | -0.039         | 0.060          |
| GLU      | 0.011          | 0.580          | 0.001          | 0.975          | 0.003          | 0.895          | 0.067          | 0.001          |

Multi-factors: age, alcohol drinking status, smoking status, physical activity, family history of chronic diseases.

Abbreviation: BMI, body mass index; WC, waist circumference; SBP, systolic blood pressure; DBP, diastolic blood pressure; TRIG, triglycerides; HDL, high density lipoprotein cholesterol; GLU, glucose; IgM, immune globulin M; IgA, immune globulin A; IgE, immune globulin E; IgG, immune globulin G.

Supplemental table 2 -Odds ratios (ORs) and 95% CI for MetS according to the IgE, IgG, IgM and IgA concentrations: a binary logistic regression.

|     |                          | Total | MetS | Model 1<br>OR(95%CI) | $P_1$ | Model 2<br>OR(95%CI) | $P_2$ |
|-----|--------------------------|-------|------|----------------------|-------|----------------------|-------|
| IgE | Q1 ( $\leq 52.045$ g/l)  | 594   | 77   | 1.000                |       |                      |       |
|     | Q2 (52.046-127.950 g/l)  | 594   | 76   | 0.985(0.701-1.383)   | 0.931 | 0.939(0.664-1.330)   | 0.724 |
|     | Q3 (127.951-318.850 g/l) | 594   | 87   | 1.152(0.828-1.603)   | 0.401 | 1.086(0.774-1.525)   | 0.632 |
|     | Q4 ( $\geq 318.851$ g/l) | 594   | 68   | 0.868(0.613-1.229)   | 0.425 | 0.794(0.554-1.139)   | 0.210 |
| IgG | Q1 ( $\leq 11.615$ g/l)  | 594   | 91   | 1.000                |       | 1.000                |       |
|     | Q2 (11.616-13.255 g/l)   | 594   | 70   | 0.738(0.528-1.032)   | 0.075 | 0.777(0.551-1.096)   | 0.151 |
|     | Q3 (13.256-14.940 g/l)   | 595   | 65   | 0.678(0.482-0.953)   | 0.025 | 0.760(0.535-1.079)   | 0.125 |
|     | Q4 ( $\geq 14.941$ g/l)  | 593   | 82   | 0.887(0.642-1.225)   | 0.467 | 0.946(0.675-1.326)   | 0.746 |
| IgM | Q1 ( $\leq 0.930$ g/l)   | 606   | 84   | 1.000                |       | 1.000                |       |
|     | Q2 (0.931-1.270 g/l)     | 586   | 83   | 1.025(0.739-1.422)   | 0.880 | 1.108(0.793-1.548)   | 0.549 |
|     | Q3 (1.271-1.760 g/l)     | 598   | 63   | 0.732(0.517-1.037)   | 0.079 | 0.807(0.566-1.152)   | 0.237 |
|     | Q4 ( $\geq 1.761$ g/l)   | 586   | 78   | 0.954(0.685-1.329)   | 0.781 | 1.132(0.805-1.591)   | 0.477 |
| IgA | Q1 ( $\leq 1.810$ g/l)   | 600   | 71   | 1.000                |       | 1.000                |       |
|     | Q2 (1.811-2.360 g/l)     | 594   | 79   | 1.143(0.811-1.610)   | 0.445 | 1.140(0.803-1.619)   | 0.462 |
|     | Q3 (2.361-2.980 g/l)     | 591   | 70   | 1.001(0.704-1.423)   | 0.995 | 1.027(0.716-1.474)   | 0.885 |
|     | Q4 ( $\geq 2.981$ g/l)   | 591   | 88   | 1.304(0.932-1.823)   | 0.122 | 1.241(0.876-1.758)   | 0.225 |

Abbreviation: OR, odd ratios; CI, confidence interval; IgM, immune globulin M; IgA, immune globulin A; IgE, immune globulin E; IgG, immune globulin G. Model 1 was not adjusted.

Model 2 was adjusted for age, smoking status, alcohol drinking status, family history of chronic disease, physical activity.
